# Supplementary material for: Evolution of high tooth replacement rates in theropod dinosaurs
Source: PLoS One. 2019 Nov 27;14(11):e0224734. doi: 10.1371/journal.pone.0224734 (PMC6880968; doi:10.1371/journal.pone.0224734)
Supplement: S1 File — (XLSX) [file pone.0224734.s002.xlsx]

## Sheet: Majungasaurus gross measurement
Specimen	Position	total length	CBL1	CBL 2	CBL 1 average	CBW1	CBW2	CBW average	CH1	CH2	CH average	AL1	AL2	AL average	CBR	CHR	Does tooth have a root?	CA	volume 1	volume 1B	volume 2	Volume 2B	volume 3	volume 3B	average volume1	Crown Volumes	Pulp cavity1	pulp cavity2	avg apical height to pulp cavity	Total length 1	Total length 2	MA	MC	MB	DA	DC	DB	MAVG	DAVG	DAVG2
MAD 07516-1	d	11.9	6.9	7.3	7.1	3.3	3.6	3.45	10.9	11	10.95	12.3	11.6	11.95	0.478261	1.57971	no		0.08		0.085		0.07		0.0783333		8.35		8.35		11.3
MAD 07877-7 B	d	13	4.9		4.9	4.5	5.4	4.95		12.4	12.4		11.9	11.9	0.918367		no		0.07	0.06	0.07	0.03	0.07	0.072	0.062		6.5		6.5		13
MAD 05432 B	d	23.7	11.7		11.7	6.11		6.11	22.6		22.6	23.9		23.9	0.522222	1.93162	no		0.53		0.55		0.56		0.546667
MAD 99114 A	d	42	14.2		14.2	9.7		9.7	36.3		36.3	36		36	0.683099	2.55634	yes		2.2		2.3		2.3		2.26667		28.7		28.7		40
96111	d	50.6	27.8		27.8	15.1		15.1							0.543165				6.7		6.9		6.8		6.8
FMNH PR2100	d02		10.91		10.91	8.48		8.48	22.88		22.88	20.82		20.82	0.78	2.1		81.72														10	8	11	10	8.5	10	9.5	9.5	−0.22
FMNH PR2100	d03		13.53		13.53	8.27		8.27							0.61	1.69		79.93														10	9.5	10	11	9	10	9.8	10.4	−0.16
FMNH PR2100	d04		13.9		13.9	7.7		7.7	24.08		24.08				0.57	1.73		80.67														13	9.5	10	12	10	13	10.8	11	−0.19
FMNH PR2100	d05		13.3		13.3	8.56		8.56	25.37		25.37	29.45		29.45	0.64	1.91		80.57														11	11	11	12	9.5	11	11	11	−0.17
FMNH PR2100	d06		13.5		13.5	7.77		7.77	25.75		25.75	27.54		27.54	0.58	1.91		81.26														11	9.5	13	11	11	11	11.2	11	−0.15
FMNH PR2100	d07		14.24		14.24	7.72		7.72	25.13		25.13	27.86		27.86	0.54	1.76		80.91														11	11		10	11	11	10.8	10.8	−0.14
FMNH PR2100	d08		13.6		13.6	7.9		7.9							0.58																		11			10		11.7	11.3
FMNH PR2100	d09		14.57		14.57	7.34		7.34							0.5																	12			11	10	12		11.2
FMNH PR2100	d10		12.82		12.82	8.59		8.59	23.76		23.76	27.65		27.65	0.67	1.85		79.97															11	16	12	10		12.9	11.8	−0.17
FMNH PR2100	d11		13.17		13.17	7.05		7.05	23		23	26.02		26.02	0.54	1.75		79.94														12	11	14	11	9.5	12	12.3	11	−0.10
FMNH PR2100	d12		12.66		12.66	7.12		7.12	19.93		19.93	23.79		23.79	0.56	1.57		78.31														12	12	16	13	10	12	13.2	11.3	−0.12
FMNH PR2100	d13		12.53		12.53	6.69		6.69	19.21		19.21	24.31		24.31	0.53	1.53		77.65														13	12	13	12	11	13	12.6	11.5	−0.08
FMNH PR2100	d14		12.28		12.28	6.7		6.7	17.87		17.87	23.41		23.41	0.55	1.46		76.77															12	14	13	11		13	12	−0.10
FMNH PR2100	d15		11.26		11.26	5.79		5.79	18.73		18.73	22.49		22.49	0.51	1.66		77.34															12	15	12	12		13.2	12.5	0.03
FMNH PR2100	d15		11.72		11.72	6.29		6.29	16.19		16.19	21.48		21.48	0.54	1.38		75.55														14	13	14	14	11	14	13.4	11.8	−0.17
FMNH PR2100	d16		12.88		12.88	5.25		5.25	18.71		18.71	23.06		23.06	0.41	1.45		77.62														13	12		13	12	13	13.4	13.3	−0.09
FMNH PR2100	d17		9.33		9.33	5.36		5.36	14.48		14.48	17.93		17.93	0.57	1.55		73.6														14	15	16		11	14	15	12.3	−0.41
FMNH PR2100	dp1		8.81		8.81	7.2		7.2	19.88		19.88	19.88		19.88	0.82	2.26		79.29														9	9	11	10	9	9	9.6	10	−0.20
95021-1 V	mx	9.3	4.7		4.7	1		1							0.212766				0.05		0.06		0.06		0.0566667
MAD 98168	mx	9.1	4.6		4.6	2.2		2.2	10.1		10.1	9.7		9.7	0.478261	2.19565	no		0.01		0.03		0.02		0.02		4.8		4.8		8.6
MAD 98046-1	mx	10.1	5.4		5.4	2.5		2.5							0.462963		no		0.04		0.03		0.04		0.0366667
MAD 07757 A	mx	13.9	5.7		5.7	2.6		2.6							0.45614		no		0.05		0.052		0.052		0.0513333		11.8		11.8		13.8
FMNH PR 2199	mx	9.1	4.9		4.9	2.5	2.8	2.65		8.9	8.9				0.510204		no		0.03	0.04	0.02	0.02	0.02	0.05	0.03
MAD 05460-25 F	mx	10.4	6.4	6.2	6.3	3.1	3.6	3.35	10.2	9.1	9.65	10.8	8.8	9.8	0.484375	1.59375	no		0.06	0.038	0.04	0.086	0.05	0.042	0.0526667		7.63		7.63		10.4
MAD 99137	mx	16.7	7.2		7.2	3.5	3.8	3.65							0.486111		no		0.15	0.196	0.13	0.132	0.15	0.97	0.288
MAD 05460-25 G	mx	28	7.6	7.9	7.75	3.7	3.6	3.65	11.1	12.5	11.8	13	12.5	12.75	0.486842	1.46053	yes		0.47		0.45		0.48		0.466667	0.1
MAD 07877-7 A	mx	14.9	6.5		6.5	3.9		3.9							0.6		no		0.12		0.09		0.11		0.106667		11.5		11.5		13
MAD 01122-1	mx	17.3	6.2	6.6	6.4	3.8	4.5	4.15	14.2	14.7	14.45	14.9		14.9	0.612903	2.29032	no		0.15	0.072	0.15	0.12	0.13	0.125	0.1245		10.8		10.8		17.1
MAD 10464	mx	28.4	9	9.73	9.365	4.3	4.2	4.25	11.6	12.3	11.95	14.9	13	13.95	0.477778	1.28889	yes		0.5		0.5		0.5		0.5	0.2
95021-1 U	mx	13.4	8.7		8.7	4.3		4.3							0.494253		no		0.13		0.16		0.14		0.143333
MAD 05460-25 D	mx	43.9	10.6	10.8	10.7	4.6	4.7	4.65	18.9	20.4	19.65	22.4	19.5	20.95	0.433962	1.78302	yes		1.3		1.3		1.4		1.33333	0.4	-----
MAD 05460-25 A	mx	22.5	10.6	10.7	10.65	4.8	4.6	4.7	20.7	21.6	21.15	22.6		22.6	0.45283	1.95283	no		0.49	0.351	0.43	0.352	0.45	0.38	0.408833
MAD 07305 A	mx	18.5	9.7		9.7	4.8		4.8	18.2		18.2	18.9		18.9	0.494845	1.87629	no		0.19		0.2		0.17		0.186667		18.5		18.5
MAD 07305 B	mx	21.8	11		11	4.8		4.8	21.8		21.8	23		23	0.436364	1.98182	no		0.37		0.35		0.33		0.35
MAD 10322	mx	16.3	8.5		8.5	4.9		4.9							0.576471		no		0.19		0.19		0.2		0.193333
MAD 98028 B	mx	21.5	8.7		8.7	4.9	5.2	5.05	21.5	20	20.75	22.1	20.5	21.3	0.563218	2.47126	no		0.33		0.32		0.32		0.323333
95021-1 T	mx	16	10.9		10.9	5.1		5.1							0.46789		no		0.31		0.32		0.32		0.316667
95021-1 F	mx	16	10.6		10.6	5.4		5.4							0.509434		no		0.29		0.28		0.3		0.29		19.2		19.2		24.4
MAD 07757 B	mx	17	9.2		9.2	5.1	5.7	5.4							0.554348		no		0.23	0.221	0.27	0.229	0.27	0.225	0.240833
95021-1 R	mx	19.2				5.5		5.5									no		0.37		0.4		0.36		0.376667
MAD 07305 C	mx	17.5	13.2		13.2	5.6		5.6	17.4		17.4	17.6		17.6	0.424242	1.31818	no		0.32		0.34		0.32		0.326667
MAD 93123-1 A	mx			12.3	12.3		5.6	5.6		14.5	14.5		16.6	16.6			no		0.43	0.424	0.45	0.434	0.45	0.452	0.44
95021-1 M	mx	20.6	13.6		13.6	5.8		5.8							0.426471		no		0.56		0.55		0.53		0.546667
MAD 93123-1 B	mx	21.8	12.9		12.9	6		6	21.8		21.8	21.7		21.7	0.465116	1.68992	no		0.59		0.59		0.6		0.593333
MAD 05406	mx	46.1	11.4	11.2	11.3	6.5	5.9	6.2	21.2	22.4	21.8	23.9	21.6	22.75	0.570175	1.85965	yes		1.8		1.8		1.9		1.83333	0.5	13.5		13.5		22.1
Utah 99.114/2 B	mx	57.7	14.3	12.8	13.55	7.7	4.8	6.25	29.5	32.9	31.2	30	36.9	33.45	0.538462	2.06294	yes		2.6		2.5		2.6		2.56667	1
MAD 05460-25 E	mx	26.3	12.1	?	12.1	6.4	6.6	6.5	25.9	24.7	25.3	25	24.1	24.55	0.528926	2.1405	no		0.6		0.6		0.6		0.6
MAD 05460-25 C	mx	41.1	14.8	15.3	15.05	6.9	6.2	6.55	26.7	22.2	24.45	25.2	23.6	24.4	0.466216	1.80405	yes		2.5		2.5		2.6		2.53333		8.25		8.25		41.6
MAD 05391	mx	49.6	12.9	12.6	12.75	6.9	6.2	6.55	25.7	25.1	25.4	27.7	24.7	26.2	0.534884	1.99225	yes		2.2		2.3		2.3		2.26667	0.7	9.7		9.7		50.1
MAD 10022	mx	28.9	13.5		13.5	6.2	7.1	6.65	23.7	25.2	24.45	29	21.6	25.3	0.459259	1.75556	no		0.93		0.91		0.91		0.916667		17.3		17.3		26.2
MAD 98028 D	mx	17.5	13.5		13.5	6.7		6.7							0.496296		no		0.54		0.53		0.54		0.536667
MAD 93178-2	mx	25	16		16	6.7		6.7							0.41875		no		0.7		0.8		0.9		0.8
MAD 96319-5	mx	52.14	12.1	12.2	12.15	6.9	6.5	6.7	21.3	20.4	20.85	23.1	20.6	21.85	0.570248	1.76033	no		2.3		2.3		2.3		2.3	0.4
MAD 05460-25 B	mx	34.7	15.3	?	15.3	6.6	7.8	7.2	28.2	31.8	30	31.3	?	31.3	0.431373	1.84314	no		1.2		1.3		1.3		1.26667		15		15		32
95021-1 J	mx	25.9				7.2		7.2							#DIV/0!		no		0.8		0.9		0.8		0.833333
95021-1 S	mx	31.7	*			7.2		7.2									no		1.5		1.3		1.4		1.4
MAD 98028 C	mx	25.6	13.2	11.5	12.35	7.5	7.4	7.45	25.6	18.1	21.85	26.1	17.4	21.75	0.568182	1.93939	no		0.6		0.5		0.6		0.566667		12		12		20.4
95021-1 G	mx	26.8	15.4		15.4	7.6		7.6							0.493506		no		0.8		1		0.9		0.9
MAD 96312	mx	69.7	14.3	15	14.65	7.8	7.5	7.65	28.7	25.4	27.05	29.7	27.5	28.6	0.545455	2.00699	yes		5.1	3.5	5.1	3.9	5.2	3.6	4.4	1
95021-1 K	mx	25.8	16.6		16.6	7.8		7.8									no		1		1		1		1
95021-1 N	mx	34.4	17.9		17.9	8.6		8.6							0.480447		no		1.1		0.9		1.1		1.03333
95021-1 L	mx	35.3	*			8.7		8.7									no		1.7		1.7		1.7		1.7
MAD 99228	mx			17.6	17.6		9	9		39.6	39.6		39.7	39.7			yes, but it's broken and difficult to measure		6.6	6.3	6.7	6.3	6.6	6.3	6.46667	2.5
MAD 07305 F	mx	12.7	7.1		7.1												no		0.07		0.06		0.05		0.06
95021-1 O	mx	16.7	12.6		12.6												no		0.45		0.46		0.46		0.456667
MAD 99080	mx																no		0.09		0.13		0.12		0.113333
MAD 96168	mx																no
FMNH PR2100	mx01		14.57		14.57	6.64		6.64							0.46																	9	8.5	10	10	9
FMNH PR2278	mx01		15.27		15.27	8.99		8.99							0.59																		11	13		10	13
FMNH PR2278	mx02		16.9		16.9	8.67		8.67	37.63		37.63	40.16		40.16	0.51	2.23		83.93														12	10	13	12	9.3	14	11.6	11.8	−0.08
FMNH PR2278	mx02		17		17	8.79		8.79							0.52																		9.5	13		11	14
FMNH PR2100	mx02					9.85		9.85							0.59																	9	8.5	9.5	8.5	9	9	9	9.9
FMNH PR2100	mx03		17.99		17.99	8.49		8.49	30		30				0.47	1.67																8	8	9.5	8.5	7.5	8	8.5	8.6
FMNH PR2278	mx03		17.1		17.1	8.81		8.81	35.01		35.01	41.03		41.03	0.52	2.05		83.01														12	12	14	12	10	13	12.5	11.5	−0.15
FMNH PR2100	mx04		18.3		18.3	8.62		8.62	36.9		36.9	39.33		39.33	0.47	2.02		83.89														9	8.5	11	10	9	9	9.4	10	−0.18
FMNH PR2278	mx04		17.19		17.19	8.67		8.67							0.5
FMNH PR2278	mx05		16.81		16.81	8.2		8.2							0.49																					11
FMNH PR2100	mx05		18.93		18.93	8.86		8.86							0.47	1.88		83.26														8.3	10	12	9.5	10	8.3	10.1	10.3	−0.23
FMNH PR2278	mx06		16.46		16.46	8.83		8.83																								11	12	16	12	11	14	12.8	12.2
FMNH PR2100	mx06		18.37		18.37	9.21		9.21	38.08		38.08	39.87		39.87	0.5	2.07		84.16														11	9.5	10	10	9	11	10	10	−0.12
FMNH PR2278	mx07		16.77		16.77	8.15		8.15							0.49																			13			13
FMNH PR2100	mx07		18.17		18.17	9.1		9.1	38.68		38.68	44.19		44.19	0.5	2.13		83.76														9	9.7	11	9.5	9	9	9.9	9.5	−0.11
FMNH PR2278	mx08		16.82		16.82	7		7							0.42																		11			10
FMNH PR2100	mx08														0.44																	9	8.5		11	9.5	9
FMNH PR2100	mx09		16.34		16.34	6.54		6.54							0.4	1.8		82.33															10		10	9.5
FMNH PR2278	mx09																															12			12
FMNH PR2100	mx10																															9			9.5		9
FMNH PR2278	mx11		14.64		14.64	6.96		6.96							0.48
FMNH PR2100	mx11																															11			10		11
FMNH PR2278	mx12		15.39		15.39	7.19		7.19							0.47
FMNH PR2100	mx12														0.42																	9	9		10	9.5	9
FMNH PR2100	mx14		11.13		11.13	5.69		5.69							0.51																			12
FMNH PR2278	mx14		12.05		12.05	6.35		6.35							0.53
FMNH PR2100	mx15		10.43		10.43	5.57		5.57							0.53
FMNH PR2278	mx17		9.33		9.33	4.48		4.48							0.48
FMNH PR2100	mx17		7.88		7.88				12.45		12.45				0.44	1.58		71.72														14	12		13	14	14	13.5	14	−0.45
FMNH PR2008	pm01		12.03		12.03	10.08		10.08							0.84																			16
FMNH PR2100	pm01					11.09		11.09							0.92	2.61		82.57														8	8.5		10	9	8
UA 8716	pm02		12.41		12.41	9.26		9.26	27.05		27.05	27.84		27.84	0.75	2.18		81.89														9	10	15	8.8	10	9	11.3	10.9	−0.18
FMNH PR2100	pm02					11.72		11.72							0.79	2.19																8.5	9		9	8.5	8.5
FMNH PR2008	pm02		12.99		12.99										0.73	2.32		82.42														12	11	16	11	12	12	13	12.5	−0.26
FMNH PR2008	pm03		14.3		14.3	9.57		9.57							0.67
FMNH PR2100	pm03					9.64		9.64							0.68
UA 8716	pm04		12.51		12.51	8.3		8.3	27.69		27.69	30.73		30.73	0.66	2.21		81.41														10	10	16	11	11	10	12	12	−0.18
FMNH PR2100	pm04								31.68		31.68				0.63	2.17																9	9.5		9.5	9.8	9
MAD 98182-1	pmx	19	7.98		7.98	4.2		4.2	15.3		15.3	18		18	0.526316	1.91729	no		0.31		0.26		0.27		0.28																If total length=CH, the measuremnt is based on the entire piece of tooth available.
FMNH PR2226	pmx	9.6	3.9	?	3.9	4.3	4.5	4.4	8.69	10.3	9.495	8.3	?	8.3	1.10256	2.22821	no		0.04		0.05		0.04		0.0433333		7.4		7.4		9.9
MAD 07305 D	pmx	18.7	9.6		9.6	5.1		5.1	18.7		18.7	19.1		19.1	0.53125	1.94792	no		0.28		0.29		0.29		0.286667
95021-1 D	pmx	22.2				5.3		5.3	20.7		20.7	19.8		19.8			no		0.3		0.32		0.32		0.313333
Utah 99.114/2 A	pmx	36.4	13.9	11.3	12.6	10.4	2.4	6.4	29	33.4	31.2	28.3	36.5	32.4	0.748201	2.08633	yes		1.7		1.7		1.8		1.73333
MAD 07305 E	pmx	22.6	8.8		8.8	6.5		6.5	21.7		21.7	21.7		21.7	0.738636	2.46591	no		0.52		0.5		0.47		0.496667		16.2		16.2		22.4
95021-1 I	pmx	25.6	12.4		12.4	6.7		6.7							0.540323		no		0.63		0.65		0.64		0.64
MAD 98028 A	pmx	23.8	13.8		13.8	7		7	23.7		23.7	22.3		22.3	0.507246	1.71739	no		0.73		0.74		0.74		0.736667
95021-1 E	pmx	21.2	7.3		7.3	7.2		7.2	17.9		17.9	20.9		20.9	0.986301	2.45205	no		0.41		0.42		0.41		0.413333
95021-1 P	pmx	19.7				7.5		7.5									no		0.5		0.6		0.6		0.566667
95021-1 H	pmx	27.2				7.7		7.7									no		0.8		0.9		0.9		0.866667
MAD 93106-5 B	pmx	25.5	12.3		12.3	8.2		8.2							0.666667		no		0.7		0.7		0.8		0.733333
95021-1 C	pmx	22.2	11.9		11.9	8.3		8.3	21.9		21.9	22		22	0.697479	1.84034	no		0.5		0.4		0.5		0.466667
MAD 93106-5 A	pmx	27.5	14.8		14.8	8.3		8.3							0.560811		no		0.9		0.9		0.9		0.9
MAD 05432 A	pmx	42.4	11.3		11.3	8.6		8.6	24.2		24.2	24.9		24.9	0.761062	2.14159	yes		2.2		2.2		2.3		2.23333	0.8	14.7		14.7		41.8
95021-1 Q	pmx	21.6	14.5		14.5	8.9		8.9							0.613793		no		1		1		0.9		0.966667
MAD 05588	pmx	36.1	11.97	12.9	12.435	7.1	10.8	8.95	15.7	29.2	22.45	17.6	26.6	22.1	0.59315	1.31161	no		1.5		1.5		1.4		1.46667		12.8		12.8		18.5
95021-1 B	pmx	23.5	12.6		12.6	9.1		9.1	18.4		18.4	17.8		17.8	0.722222	1.46032	no		0.6		0.5		0.5		0.533333
MAD07743	pmx	48.2	11.3	12.3	11.8	9.8	10.5	10.15	23.5	26.6	25.05	23.4	25.5	24.45	0.867257	2.07965	yes		3.2		3.4		3.4		3.33333	1.3	8.2		8.2		44.7
95021-1 A	pmx	20.2															no		0.31		0.32		0.31		0.313333

## Sheet: Majungasaurus increments
specimen	tooth ID	tooth age (days)	tooth apicobasal length (mm)	crown height (mm)	tooth mesiodistal length (mm)	measurement	# lines	average thickness
05460-25-G	complete dentary tooth	210	28	11.8	7.75	46	4	11.5			Mean all teeth	#REF!
						56	4	14			StdDev all teeth	#REF!
						123	10	12.3
						16.6	2	8.3			Mean all measurements	17.691
						12	1	12			StdDev all measurements	5.07236
						21.3	2	10.65	specimen average	11.4583
07516-1	incomplete dentary tooth	157	11.9	11	7.1	79	6	13.1667
						13	1	13
						44	3	14.6667
						567	36	15.75
						135	10	13.5
						520	30	17.3333
						72	5	14.4
						252	18	14	specimen average	14.4771
07757-B	incomplete maxillary tooth	159	17		9.2	782	33	23.697
						167	9	18.5556
						384	12	32
						346	13	26.6154
						907	29	31.2759
						72	4	18
						62	3	20.6667
						208	9	23.1111
						189	10	18.9
						235	9	26.1111	specimen average	23.8933
95021-1V	incomplete maxillary tooth	N/A (poor preservation)	9.3		4.7	47	2	23.5	specimen average	23.5
96319-5	complete dentary tooth	230	52.1	20.1	12.2	99	5	19.8
						33	2	16.5
						80	4	20
						93	4	23.25
						35	2	17.5
						23	1	23
						21	1	21
						160	10	16
						40	3	13.3333	specimen average	18.9315
99114-A	incomplete dentary tooth	N/A (poor preservation)	42	36.3	14.2	104	5	20.8
						134	6	22.3333
						59	3	19.6667	specimen average	20.9333
96312	complete maxillary tooth	281	69.7	28	14.7	100	5	20
						87	6	14.5
						69	3	23
						17	1	17
						17	1	17	specimen average	18.3
_05391	maxillary	N/A	49.6	25.4	12.75	907	46	19.7174
						133	6	22.1667
						796	42	18.9524	specimen average	20.2788
93016-5	premaxillary	N/A	27.5	n/a	14.8	940	55	17.0909	specimen average	17.0909
_05588	premaxillary	N/A	36.1	22.5	12.4	46	4	11.5
						67	5	13.4
						64	4	16
						120	9	13.3333
						81	8	10.125
						76	5	15.2	specimen average	13.2597
10022	maxillary	N/A	28.9	24.5	13.5	222	12	18.5
						695	32	21.7188	specimen average	20.1094
_07743	premaxillary		48.2	25	11.8
99228	maxillary			39.6	17.6	11	1	11
						13	1	13
						15	1	15	specimen average	13
						TOTAL	558
			Majungasaurus data
			28	210
			11.9	157
			17	159
			52.1	230
			69.7	281
			Camarasaurus data
			48	208
			117	315
			62	253
			31	190
			8	130
			Diplodocus data
			32	141
			59	187
			50	178
			33	144
			25	110
			54	183
			36	145
			23	113

## Sheet: Majungasaurus rates
Tooth Metrics
note: A-B measured as CH of Smith, 2007:fig. 1B
tooth age estimates are in BLUE
numbers in RED are minimum measurements					Tooth Position
highlighted numbers are replacement rate estimates				Mean repl
Element	Side	ID		rate for jaw	1			2			3			4			5			6			7			8			9			10			11			12			13			14			15
				element	M-D	A-B		M-D	A-B		M-D	A-B		M-D	A-B		M-D	A-B		M-D	A-B		M-D	A-B		M-D	A-B		M-D	A-B		M-D	A-B		M-D	A-B		M-D	A-B		M-D	A-B		M-D	A-B		M-D	A-B
Maxilla	R	UA 9944	Gen 1
			Gen 2
			Gen 3
Maxilla	R	MAD 07683	Gen 1			40.9	220.062	14.3			15	31.8	200.974	17.3	68.3	273.433	14.1	35.8		14.9			3.02m	13.1	159.619
			Gen 2		9.7	13.3	160.076							12.9	37.9	213.844	13.8	29.2	195.396	13.1	28.2	193.235				6.7	11.6	156.177
			REPL RATE	59.7874			59.9853									59.5895
Maxilla	R	MAD 10389	Gen 1					14.3	21.8											13	33.8	205.227	11.7	47.3	233.079
			Gen 2		9.3	19	172.976	12												8	14.7			25.3
			REPL RATE
Dentary	R	MAD 10440	Gen 1																										10	45	228.44
			Gen 2																										6.7	13.8	161.218
			REPL RATE	49.5187																											67.221
Dentary	L	MAD_96212_Left	Gen 1																										10.1	34	205.651													11.6	50	238.47
			Gen 2																										60	7	145.508													9.3	29	194.964
			REPL RATE	51.8241																											60.1425															43.5057
Maxilla	L	MAD_96212_Left	Gen 1						68.4								17.8	54.9	248.101		64					16	52	242.425										15	48.4	235.283	12.3	41	220.267	11.3	50	238.47
			Gen 2						40.1	218.411							8.7	21	177.44		42					13.9	36	209.868										8.7	15.4	164.86	8.4	11	154.796	10	25	186.267	7.5	15	163.952
			Gen 3																							10	10	152.486
			REPL RATE_1																70.6615									32.5568												70.4227			65.472			52.2025
			REPL RATE_2	58.1162																								57.382
Dentary	R	MAD_96212_Right	Gen 1					10.7	55.7	249.655	13.5	57.1		13.3	55.3	248.879	15	46.5	231.47	12.4	55.7	249.655	12.4	5.26		12.1	44	226.409	12.9	53	244.39	12.4	52	242.425	12.2	30.6	198.406							11	39	216.132	9.4	33	203.53
			Gen 2	46.046													14	28.9	194.748	10.9	34.1	205.862	7.4	16	166.22				8.9	27	190.632							7.6	14.1	161.903	6	4	138.457	6.3	16	166.22
																			36.7217			43.7923									53.7576															49.9123
Maxilla	R	MAD_96212_Right	Gen 1																										16.9	55	248.296					35.6	209.027
			Gen 2																										13.5	24	184.073	10.1	15	163.952		7.2	145.976				9.5	13	159.39
			Gen 3	63.6371				7.8	9.4	151.096	13.1	19	172.976																		64.2227						63.0514
Premaxilla	R	MAD_96212_Right	Gen 1		14.2	69.9	276.36	15.8	87.6		13.2	78.9	292.429	15.2	60.6	259.057
			Gen 2					12.4	38.7	215.509	8.4	19.7		12	49.7	237.874
			REPL RATE
Maxilla	L	MAD_99114	Gen 1																	14.6	57.9	253.9													13.6			15.1						12.4
			Gen 2		13.2	27.5	191.718				11.1	228		90	17.6	169.833	13.1	27.2	191.067	11.7	15.5	165.087	13.3	24.3	184.732				13.6	12.7	158.703				12.1	31	199.263	9	12.6	158.474	9.2	10	152.486	10.6	20	175.212
			Gen 3		6.1	8.5											9.3	11.6	156.177																5.9	12.2	157.556
			REPL RATE	55.1369															34.8897			88.8136															41.7074
Premaxilla	L	MAD_99114	Gen 1
			Gen 2		9	16	166.22	13.6	31	199.263	15.3	54.4	247.127	13.4	23.7	183.413
			Gen 3					7.5	9	150.168	10	15	163.952	7	11.4	155.717
			REPL RATE	53.3223						49.0952			83.1758			27.6958
Premaxilla	R	MAD_99114	Gen 1
			Gen 2					14.2			12.6	42.3	222.938	13.5
Premaxilla	L	MAD_99195	Gen 1
			Gen 2		11.2	40	218.204	12	77	289.092	14			13	64.2
			Gen 3			13	159.39	8.7	39	216.132				9	25
			REPL RATE	65.8871			58.8141			72.96
Dentary	R	MAD_99304_r_dentary	Gen 1																										12
Note: measurements are from 9th preserved alveolus counting from the mesial direction, absolute position unknown			Gen 2																										10.1	12.7
			Gen 3																										5.3	7	145.508
Maxilla	L	MAD_05460	Gen 1		143	63	263.59				15.9	64.5	266.399				15.1	57.4	252.939							14.2	47	232.476					48.8					10.4	19.7		8.8	24	183.547	8.6	21
			Gen 2		129	30.9	199.049										12.7	24.4	184.952							9.5	17	168.48	11.5	19	172.976	9.5	15.6								6.8	11	154.431
			Gen 3								7.6	18	170.732				8.1	11										63.996															29.1161
			REPL RATE_1				64.5406												67.9873
			REPL RATE_2	58.7254
			GRAND MEAN	56.2001
			Std dev grand mean	6.22157
		Maximum tooth formation time		292.429
[truncated: 6 more columns]

## Sheet: Ceratosaurus increments
specimen	tooth ID	tooth age (days)	tooth apicobasal length (mm)	crown height (mm)	tooth mesiodistal length (mm)	measurement	# lines	average thickness
MWC 1	?		4	3.5 est	1.4	161	9	17.8889
						27	2	13.5
						12	1	12
						67	8	8.375	specimen average	14.4645	Mean all measurements	14.4645
						55	4	13.75			StdDev all measurements	3.25927
						158	10	15.8
						105	7	15
						222	10	22.2
						35	3	11.6667

## Sheet: Ceratosaurus rates
Tooth Metrics
note: A-B measured as CH of Smith, 2007:fig. 1B
tooth age estimates are in BLUE
numbers in RED are minimum measurements					Tooth Position
highlighted numbers are replacement rate estimates				Mean repl
Element	Side	ID		rate for jaw	1			2			3			4			5			6			7			8			9			10			11			12			13			14			15
				element	M-D	A-B		M-D	A-B		M-D	A-B		M-D	A-B		M-D	A-B		M-D	A-B		M-D	A-B		M-D	A-B		M-D	A-B		M-D	A-B		M-D	A-B		M-D	A-B		M-D	A-B		M-D	A-B		M-D	A-B
Maxilla	R	BYU 12893	Gen 1																	24	104	333.737							19	63	263.59
			Gen 2		19	69	274.716							21	60	257.916				18	47	232.476	21	29	194.964				11	11	154.796
			Gen 3					13	15	163.952
			REPL RATE	105.027																		101.261									108.794
		Maximum tooth formation time		333.737
[truncated: 6 more columns]

## Sheet: Allosaurus increments
specimen	tooth ID	tooth age (days)	tooth apicobasal length (mm)	crown height (mm)	tooth mesiodistal length (mm)	measurement	# lines	average thickness
BYU 2028	maxillary	N/A				22	1	22
						46	2	23
						120	5	24
						92	4	23	specimen average	23	Mean all measurements	23
							12				StdDev all measurements	0.816497

## Sheet: Allosaurus rates
Tooth Metrics
note: A-B measured as CH of Smith, 2007:fig. 1B
tooth age estimates are in BLUE
numbers in RED are minimum measurements					Tooth Position
highlighted numbers are replacement rate estimates				Mean repl
Element	Side	ID		rate for jaw	1			2			3			4			5			6			7			8			9			10			11			12			13			14			15
				element	M-D	A-B		M-D	A-B		M-D	A-B		M-D	A-B		M-D	A-B		M-D	A-B		M-D	A-B		M-D	A-B		M-D	A-B		M-D	A-B		M-D	A-B		M-D	A-B		M-D	A-B		M-D	A-B		M-D	A-B
Dentary	L	BYU 2028	Gen 1		14	90	311.334	15			20			19	113	347.29	18	118	354.532	17	106	336.806	19			18	95	319.519	17			17	87	306.324	17	98	324.332	17			16	76	287.324
			Gen 2								17	54	246.347				12	30	197.118				16	24	184.073				17	48	234.482				13	44	226.409							11	19	172.976
			Gen 3
			REPL RATE	97.9236																																	97.9236
Premaxilla	L	BYU 2028	Gen 1		16	95	319.519	14			14	81	296.083		61	259.815	15	73	281.97
			Gen 2
			Gen 3
			REPL RATE
Maxilla	L	BYU 2028	Gen 1		16	99	325.92	16	43		19	71	278.36	24			24
			Gen 2		11	41	220.267					19	172.976
			Gen 3
			REPL RATE	105.518			105.653						105.383
Premaxilla	R	BYU 2028	Gen 1		19			20	103		18			18			18
			Gen 2
			Gen 3
			REPL RATE
Maxilla	R	BYU 2028	Gen 1																	20			21						22
			Gen 2
			Gen 3
			REPL RATE
Premaxilla	L	BYU 8901	Gen 1		14			19	77	289.092	21	100	327.5	18	99
			Gen 2		9	18					13	27	190.632
			Gen 3
			REPL RATE										136.868
Maxilla	L	BYU 8901	Gen 1		14			22			22			23						19			23			19			20			20			19						16
			Gen 2
			Gen 3
			REPL RATE
Premaxilla	R	BYU 8901	Gen 1		22	81	297.245	15	115	350.212	20	94	317.899	18	115	350.212	19
			Gen 2		13			11	27	190.632				11	42	222.323
			Gen 3
			REPL RATE							159.579						127.889
Maxilla	R	BYU 8901	Gen 1			53	244.235	22			20	74					24			23	95	319.519				21			20	89	309.672
			Gen 2																																												20
			Gen 3
			REPL RATE
Dentary	R	BYU 8901	Gen 1											16	93	316.27							17	98	324.332
			Gen 2											13	37	211.964							15	43	224.37
			Gen 3	102.134												104.306									99.9625
			REPL RATE
			GRAND MEAN	101.859
			Std dev grand mean	3.80469
		Maximum tooth formation time		354.532
[truncated: 8 more columns]

## Sheet: Regression data
	tooth volume (ml)	ln tooth volume (ml)	body mass (kg)	ln body mass (kg)	increment width (microns)	ln increment width (microns)	tooth formation time (days)	ln tooth formation time (days)	tooth replacement rate (days)	ln tooth replacement rate (days)
Triceratops	2.65	0.97456	13536	9.51311	15.8	2.76001	381	5.9428	83	4.41884
Prosaurolophus	2	0.693147	3112	8.04302	16	2.77259	323	5.77765	81	4.39445
Maiasaura	1.9	0.641854	3656	8.20412	13	2.56495	281	5.63835	58	4.06044
Edmontosaurus	2	0.693147	7586	8.93406	19.8	2.98568	339	5.826	50	3.91202
Deinonychus	0.2	-1.60944	97	4.57471	10.1	2.31254	413	6.02345	290	5.66988
Albertosauridae_indet	18	2.89037	2012	7.60688	14	2.63906	519	6.2519	454	6.1181
Tyrannosaurus	138	4.92725	7693	8.94807	17	2.83321	933	6.83841	777	6.65544
Camarasaurus	1.65	0.500775	28901	10.2716	16	2.77259	315	5.75257	62	4.12713
Dicraeosaurus	—	—	7311	8.89714	—	—	191	5.25227	20	2.99573
Diplodocus	26.5	3.27714	31996	10.3734	16	2.77259	187	5.23111	35	3.55535
Nigersaurus	—	—	2195	7.69394	—	—	184	5.21494	14	2.63906
Mamenchisaurus	—	—	19770	9.89192	—	—	272	5.6058	98	4.58497
Titanosauria_indet	—	—	—	—	—	—	188	5.23644	20	2.99573
Massospondylus	—	—	488	6.19032	—	—	153	5.03044	24	3.17805
Patagosaurus	—	—	27221	10.2117	—	—	206	5.32788	58	4.06044
Majungasaurus	3	1.09861	1614	7.38647	18	2.89037	293	5.68017	56	4.02535
Allosaurus	—	—	2541	7.84031	22	3.09104	359	5.88332	104	4.64439
Ceratosaurus	—	—	966	6.87316	14	2.63906	337	5.82008	107	4.67283
Giraffatitan	—	—	34003	10.4342	—	—	—	—	92	4.52179
