# Supplementary material for: Evolution of high tooth replacement rates in theropod dinosaurs
Source: PLoS One. 2019 Nov 27;14(11):e0224734. doi: 10.1371/journal.pone.0224734 (PMC6880968; doi:10.1371/journal.pone.0224734)
Supplement: S2 File — (R) [file pone.0224734.s003.R]

#Code below is for plotting trait values on phylogeny scaled against geologic time, modified from https://lukejharmon.github.io/ilhabela/instruction/2015/07/05/plotting-methods/

#setwd
setwd("/Users/michaeldemic/Desktop/Majungasaurus_tooth_project/! Submit/R Code")
require(ape)
require(phytools)

#apply branch lengths using code provided by Graeme Lloyd
source("http://www.graemetlloyd.com/pubdata/functions_2.r") 
clade.tree<-read.nexus("tree_toothReplacement.nex")
ages<-read.table("toothReplacement_ages.txt",row.names=1)
branchLengthsTree<-date.phylo(clade.tree, ages, rlen=1, method="equal")

#plot tree with branch lengths if provided (no character states plotted)
#plotTree(branchLengthsTree)

characterstates<-read.csv("ln_toothReplacement_rates.csv",header=FALSE,row.names=1)
## or x<-read.csv("characterstates.csv",header=TRUE,row.names=1)
characterstates<-as.matrix(characterstates)[,1]
characterstates

#plot continuous character map
contMap(branchLengthsTree, characterstates, res=100, fsize=NULL, ftype=NULL, lwd=4, legend=NULL,lims=NULL, outline=FALSE, sig=3, type="phylogram", direction="rightwards",
plot=TRUE)

#________________________________________________________________________________

#Code below is for running and plotting mass v. replacement rate regression

require(nlme)
require(ape)
require(lmodel2)
require(calibrate)

#setwd
setwd("/Users/michaeldemic/Desktop/Majungasaurus_tooth_project/! Submit/ R Code")

#Load the data
data<-read.table("toothReplacementRegressionData.txt",header=TRUE)

#Read trees
tree<-read.nexus("tree_toothReplacement.nex")

#Make versions of the tree that exclude the indeterminate titanosaur since it lacks a body mass estimate
dtree<-drop.tip(tree,"Titanosauria_indet")

#Create a plot that shows the prediction envelope for ln(tooth replacement rate) predicted by ln(body mass)
plot(((data$lnBM)),((data$lnTR)),xlim=c(4,11),ylim=c(2,7),xlab="ln body mass (kg)",ylab="ln tooth replacement rate (days))",main="",pch=21,bg="black")

y<-(data$lnTR)
names(y)<-data$Name_in_tree
x<-(data$lnBM)
names(x)<-data$Name_in_tree

regression.lm<-lm(y~x)
points(cbind(sort(x),predict(regression.lm,interval="predict")[order(x),1]),type="line",lwd=1.5,lty=1)
points(cbind(sort(x),predict(regression.lm,interval="predict")[order(x),2]),type="line",lwd=1.5,lty=2)
points(cbind(sort(x),predict(regression.lm,interval="predict")[order(x),3]),type="line", lwd=1.5,lty=2)

#to label points, add this
#textxy(((data$lnBM)),((data$lnTR)),labs=data$Name_in_trees)

#Look at confidence intervals of the coefficient and y-intercept of an ordinary least squares regression
lmodel2(y~x)

#Generalised least squares

#apply branch lengths using code provided by Graeme Lloyd
source("http://www.graemetlloyd.com/pubdata/functions_2.r") 
clade.tree<-read.nexus("tree_toothReplacement.nex")
ages<-read.table("toothReplacement_ages.txt",row.names=1)
branchLengthsTree<-date.phylo(dtree, ages, rlen=1, method="equal")

y1<-(data$lnTR)
names(y1)<-data$Name_in_trees
x1<-(data$lnBM)
names(x1)<-data$Name_in_trees

x2<-x1[match(dtree$tip.label,names(x1))]
y2<-y1[match(dtree$tip.label,names(y1))]

VV<-vcv.phylo(branchLengthsTree)
tipheights<-diag(VV)

lgls_i<- gls(y2 ~ x2, data=data.frame(cbind(x2,y2)), correlation=corPagel(value=1.0,phy=branchLengthsTree),weights=varFixed(~tipheights))

lgls_i

#plot phylogenetic regression line
curve(coef(lgls_i)[2]*x+coef(lgls_i)[1], col="red", type='l', lwd=2, add=TRUE)
