# Supplementary material for: Evolution of high tooth replacement rates in theropod dinosaurs
Source: PLoS One. 2019 Nov 27;14(11):e0224734. doi: 10.1371/journal.pone.0224734 (PMC6880968; doi:10.1371/journal.pone.0224734)
Supplement: S3 File — (CSV) [file pone.0224734.s004.csv]

Triceratops	4.418840608
Prosaurolophus	4.394449155
Maiasaura	4.060443011
Edmontosaurus	3.912023005
Deinonychus	5.669880923
Albertosauridae_indet	6.118097198
Tyrannosaurus	6.65544035
Camarasaurus	4.127134385
Dicraeosaurus	2.995732274
Diplodocus	3.555348061
Nigersaurus	2.63905733
Mamenchisaurus	4.584967479
Titanosauria_indet	2.995732274
Massospondylus	3.17805383
Patagosaurus	4.060443011
Majungasaurus	4.025351691
Allosaurus	4.644390899
Ceratosaurus	4.672828834
Giraffatitan	4.521788577
