# Supplementary material for: Evolution of high tooth replacement rates in theropod dinosaurs
Source: PLoS One. 2019 Nov 27;14(11):e0224734. doi: 10.1371/journal.pone.0224734 (PMC6880968; doi:10.1371/journal.pone.0224734)
Supplement: S6 File — (NEX) [file pone.0224734.s007.nex]

#NEXUS
[written Wed Aug 29 22:44:46 EDT 2018 by Mesquite  version 3.2 (build 801) at Michaels-MacBook-Pro-6.local/172.20.10.2]

BEGIN TAXA;
	TITLE Untitled_Block_of_Taxa;
	DIMENSIONS NTAX=19;
	TAXLABELS
		Triceratops Prosaurolophus Maiasaura Edmontosaurus Deinonychus Ceratosaurus Allosaurus Albertosauridae_indet Tyrannosaurus Majungasaurus Diplodocus Camarasaurus Patagosaurus Massospondylus Mamenchisaurus Giraffatitan Dicraeosaurus Nigersaurus Titanosauria_indet 
	;

END;


BEGIN CHARACTERS;
	TITLE  Character_Matrix;
	DIMENSIONS  NCHAR=2;
	FORMAT DATATYPE = STANDARD GAP = - MISSING = ? SYMBOLS = "  0 1";
	MATRIX
	Triceratops            ??
	Prosaurolophus         ??
	Maiasaura              ??
	Edmontosaurus          ??
	Deinonychus            ??
	Ceratosaurus           ??
	Allosaurus             ??
	Albertosauridae_indet  ??
	Tyrannosaurus          ??
	Majungasaurus          ??
	Diplodocus             ??
	Camarasaurus           ??
	Patagosaurus           ??
	Massospondylus         ??
	Mamenchisaurus         ??
	Giraffatitan           ??
	Dicraeosaurus          ??
	Nigersaurus            ??
	Titanosauria_indet     ??

;

END;
BEGIN TREES;
	Title 'Trees from "tree_toothReplacement.nex"';
	ID 0165886da4c11;
	LINK Taxa = Untitled_Block_of_Taxa;
	TRANSLATE
[0] 		1 Triceratops,
[1] 		2 Prosaurolophus,
[2] 		3 Maiasaura,
[3] 		4 Edmontosaurus,
[4] 		5 Deinonychus,
[5] 		6 Ceratosaurus,
[6] 		7 Allosaurus,
[7] 		8 Albertosauridae_indet,
[8] 		9 Tyrannosaurus,
[9] 		10 Majungasaurus,
[10] 		11 Diplodocus,
[11] 		12 Camarasaurus,
[12] 		13 Patagosaurus,
[13] 		14 Massospondylus,
[14] 		15 Mamenchisaurus,
[15] 		16 Giraffatitan,
[16] 		17 Dicraeosaurus,
[17] 		18 Nigersaurus,
[18] 		19 Titanosauria_indet;
	TREE 'August2018+' = ((1,(3,(2,4))),(((6,10),(7,(5,(8,9)))),(14,(13,(15,((18,(11,17)),(12,(16,19))))))));

END;


BEGIN ASSUMPTIONS;
	TYPESET * UNTITLED   =  unord:  1 -  2;

END;

BEGIN MESQUITECHARMODELS;
	ProbModelSet * UNTITLED   =  'Mk1 (est.)':  1 -  2;
END;

Begin MESQUITE;
		MESQUITESCRIPTVERSION 2;
		TITLE AUTO;
		tell ProjectCoordinator;
		timeSaved 1535597086721;
		getEmployee #mesquite.minimal.ManageTaxa.ManageTaxa;
		tell It;
			setID 0 9208675185339083676;
		endTell;
		getEmployee #mesquite.charMatrices.ManageCharacters.ManageCharacters;
		tell It;
			setID 0 3437614656473829717;
			mqVersion 320;
			checksumv 0 3 2620266213 null  getNumChars 2 numChars 2 getNumTaxa 19 numTaxa 19   short true   bits 0   states 0   sumSquaresStatesOnly 0.0 sumSquares 0.0 longCompressibleToShort false usingShortMatrix true   NumFiles 1 NumMatrices 1;
			mqVersion;
		endTell;
		getWindow;
		tell It;
			suppress;
			setResourcesState false false 100;
			setPopoutState 300;
			setExplanationSize 0;
			setAnnotationSize 0;
			setFontIncAnnot 0;
			setFontIncExp 0;
			setSize 1147 719;
			setLocation 36 23;
			setFont SanSerif;
			setFontSize 10;
			getToolPalette;
			tell It;
			endTell;
			desuppress;
		endTell;
		getEmployee  #mesquite.minimal.ManageTaxa.ManageTaxa;
		tell It;
			showTaxa #9208675185339083676 #mesquite.lists.TaxonList.TaxonList;
			tell It;
				setTaxa #9208675185339083676;
				getWindow;
				tell It;
					newAssistant  #mesquite.lists.TaxonListCurrPartition.TaxonListCurrPartition;
					setExplanationSize 30;
					setAnnotationSize 20;
					setFontIncAnnot 0;
					setFontIncExp 0;
					setSize 1047 647;
					setLocation 36 23;
					setFont SanSerif;
					setFontSize 10;
					getToolPalette;
					tell It;
						setTool mesquite.lists.TaxonList.TaxonListWindow.wand;
					endTell;
				endTell;
				showWindow;
				getEmployee #mesquite.lists.ColorTaxon.ColorTaxon;
				tell It;
					setColor Red;
					removeColor off;
				endTell;
				getEmployee #mesquite.lists.TaxonListAnnotPanel.TaxonListAnnotPanel;
				tell It;
					togglePanel off;
				endTell;
			endTell;
		endTell;
		getEmployee  #mesquite.trees.BasicTreeWindowCoord.BasicTreeWindowCoord;
		tell It;
			makeTreeWindow #9208675185339083676  #mesquite.trees.BasicTreeWindowMaker.BasicTreeWindowMaker;
			tell It;
				suppressEPCResponse;
				setTreeSource  #mesquite.trees.StoredTrees.StoredTrees;
				tell It;
					setTreeBlock 1;
					setTreeBlockID 0165886da4c11;
					toggleUseWeights off;
				endTell;
				setAssignedID 1037.1535597077823.1810736816098594542;
				getTreeWindow;
				tell It;
					setExplanationSize 30;
					setAnnotationSize 20;
					setFontIncAnnot 0;
					setFontIncExp 0;
					setSize 1047 647;
					setLocation 36 23;
					setFont SanSerif;
					setFontSize 10;
					getToolPalette;
					tell It;
					endTell;
					setActive;
					getTreeDrawCoordinator #mesquite.trees.BasicTreeDrawCoordinator.BasicTreeDrawCoordinator;
				tell It;
					suppress;
					setTreeDrawer  #mesquite.trees.SquareLineTree.SquareLineTree;
					tell It;
						setNodeLocs #mesquite.trees.NodeLocsStandard.NodeLocsStandard;
						tell It;
							branchLengthsToggle off;
							toggleScale on;
							toggleBroadScale off;
							toggleCenter on;
							toggleEven on;
							setFixedTaxonDistance 0;
						endTell;
						setEdgeWidth 4;
						showEdgeLines on;
						orientUp;
					endTell;
					setBackground White;
					setBranchColor Black;
					showNodeNumbers off;
					showBranchColors on;
					labelBranchLengths off;
					centerBrLenLabels on;
					showBrLensUnspecified on;
					showBrLenLabelsOnTerminals on;
					setBrLenLabelColor 0 0 255;
					setNumBrLenDecimals 6;
					desuppress;
					getEmployee #mesquite.trees.BasicDrawTaxonNames.BasicDrawTaxonNames;
					tell It;
						setColor Black;
						toggleColorPartition off;
						toggleColorAssigned on;
						toggleShadePartition off;
						toggleShowFootnotes on;
						toggleNodeLabels on;
						toggleCenterNodeNames off;
						toggleShowNames on;
						namesAngle ?;
					endTell;
				endTell;
					setTreeNumber 1;
					setDrawingSizeMode 0;
					toggleLegendFloat on;
					scale 0;
					toggleTextOnTree off;
					togglePrintName on;
					showWindow;
				endTell;
				desuppressEPCResponse;
				getEmployee #mesquite.trees.ColorBranches.ColorBranches;
				tell It;
					setColor Red;
					removeColor off;
				endTell;
				getEmployee #mesquite.ornamental.BranchNotes.BranchNotes;
				tell It;
					setAlwaysOn off;
				endTell;
				getEmployee #mesquite.ornamental.ColorTreeByPartition.ColorTreeByPartition;
				tell It;
					colorByPartition off;
				endTell;
				getEmployee #mesquite.ornamental.DrawTreeAssocDoubles.DrawTreeAssocDoubles;
				tell It;
					setOn on;
					toggleShow consensusFrequency;
					setDigits 4;
					writeAsPercentage off;
					toggleCentred off;
					toggleHorizontal on;
					toggleWhiteEdges on;
					toggleShowOnTerminals on;
					setFontSize 10;
					setOffset 0  0;
				endTell;
				getEmployee #mesquite.ornamental.DrawTreeAssocStrings.DrawTreeAssocStrings;
				tell It;
					setOn on;
					toggleCentred on;
					toggleHorizontal on;
					setFontSize 10;
					setOffset 0  0;
					toggleShowOnTerminals on;
				endTell;
				getEmployee #mesquite.trees.TreeInfoValues.TreeInfoValues;
				tell It;
					panelOpen false;
				endTell;
			endTell;
		endTell;
		getEmployee  #mesquite.charMatrices.BasicDataWindowCoord.BasicDataWindowCoord;
		tell It;
			showDataWindow #3437614656473829717 #mesquite.charMatrices.BasicDataWindowMaker.BasicDataWindowMaker;
			tell It;
				getWindow;
				tell It;
					setExplanationSize 30;
					setAnnotationSize 20;
					setFontIncAnnot 0;
					setFontIncExp 0;
					setSize 1047 647;
					setLocation 36 23;
					setFont SanSerif;
					setFontSize 10;
					getToolPalette;
					tell It;
						setTool mesquite.charMatrices.BasicDataWindowMaker.BasicDataWindow.ibeam;
					endTell;
					setTool mesquite.charMatrices.BasicDataWindowMaker.BasicDataWindow.ibeam;
					colorCells  #mesquite.charMatrices.NoColor.NoColor;
					colorRowNames  #mesquite.charMatrices.TaxonGroupColor.TaxonGroupColor;
					colorColumnNames  #mesquite.charMatrices.CharGroupColor.CharGroupColor;
					colorText  #mesquite.charMatrices.NoColor.NoColor;
					setBackground White;
					toggleShowNames on;
					toggleShowTaxonNames on;
					toggleTight off;
					toggleThinRows off;
					toggleShowChanges on;
					toggleSeparateLines off;
					toggleShowStates on;
					toggleAutoWCharNames on;
					toggleAutoTaxonNames off;
					toggleShowDefaultCharNames off;
					toggleConstrainCW on;
					toggleBirdsEye off;
					toggleShowPaleGrid off;
					toggleShowPaleCellColors off;
					toggleShowPaleExcluded off;
					togglePaleInapplicable on;
					toggleShowBoldCellText off;
					toggleAllowAutosize on;
					toggleColorsPanel off;
					toggleDiagonal on;
					setDiagonalHeight 80;
					toggleLinkedScrolling on;
					toggleScrollLinkedTables off;
				endTell;
				getWindow;
				tell It;
					forceAutosize;
				endTell;
				hideWindow;
				getEmployee #mesquite.charMatrices.AlterData.AlterData;
				tell It;
					toggleBySubmenus off;
				endTell;
				getEmployee #mesquite.charMatrices.ColorByState.ColorByState;
				tell It;
					setStateLimit 9;
					toggleUniformMaximum on;
				endTell;
				getEmployee #mesquite.charMatrices.ColorCells.ColorCells;
				tell It;
					setColor Red;
					removeColor off;
				endTell;
				getEmployee #mesquite.categ.StateNamesStrip.StateNamesStrip;
				tell It;
					showStrip off;
				endTell;
				getEmployee #mesquite.charMatrices.AnnotPanel.AnnotPanel;
				tell It;
					togglePanel off;
				endTell;
				getEmployee #mesquite.charMatrices.CharReferenceStrip.CharReferenceStrip;
				tell It;
					showStrip off;
				endTell;
				getEmployee #mesquite.charMatrices.QuickKeySelector.QuickKeySelector;
				tell It;
					autotabOff;
				endTell;
				getEmployee #mesquite.charMatrices.SelSummaryStrip.SelSummaryStrip;
				tell It;
					showStrip off;
				endTell;
				getEmployee #mesquite.categ.SmallStateNamesEditor.SmallStateNamesEditor;
				tell It;
					panelOpen true;
				endTell;
			endTell;
		endTell;
		endTell;
end;
